# Supplementary material for: Evaluation of the performance of different membrane materials for microalgae cultivation on attached biofilm reactors
Source: Royal Society of Chemistry journal article supplement (doi:10.1039/d1ra07335d), 2022-01-01
Supplement: d1ra07335d1.pdf [file d1ra07335d1.pdf]

## Supplementary Information

### **Evaluation of the performance of different membrane materials for microalgae cultivation on attached biofilm reactors**

Yonggang Zhang<sup>1</sup>, Rui Ma<sup>2</sup>, Huaqiang Chu<sup>2</sup>, Xuefei Zhou<sup>2</sup>, Tianming Yao<sup>1\*</sup>, Yalei  
Zhang<sup>2\*</sup>

*<sup>1</sup>School of Chemical Science and Engineering, Tongji University,  
Shanghai 200092, China.*

*<sup>2</sup>State Key Laboratory of Pollution Control and Resource Reuse, Tongji University,  
Shanghai 200092, China.*

\*Corresponding author phone: +86-21-65983292; fax: +86-21-65985811;

E-mail: tmyao@tongji.edu.cn (T. Yao); zhangyalei@tongji.edu.cn (Y. Zhang)

(A)

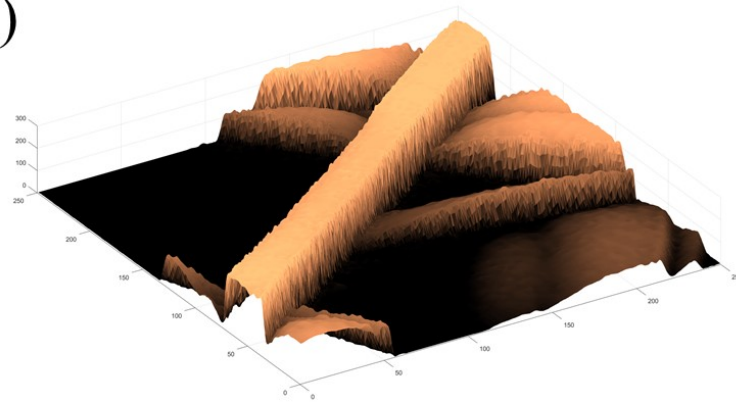

(B)

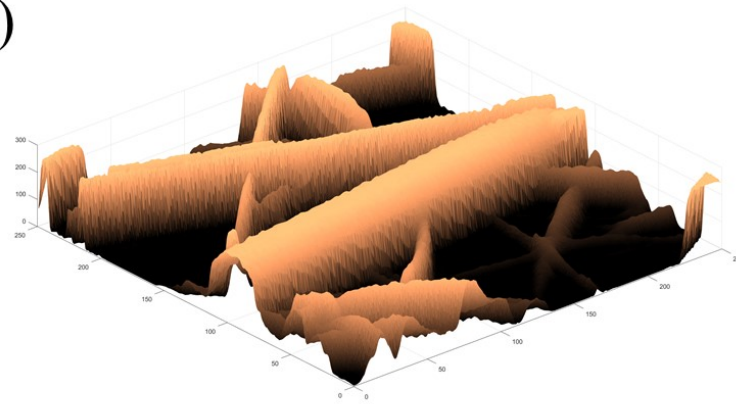

Fig. S1 The modeled three-dimensional (3D) fractal membrane surfaces of the PP and GF.
